# Supplementary material for: Effect of treatment with conditioned media derived from C2C12 myotube on adipogenesis and lipolysis in 3T3-L1 adipocytes
Source: PubMed Central journal article supplement (PMC7406041; doi:10.1371/journal.pone.0237095), 2020-08-05

# Blot images of Fig 1A, E, F

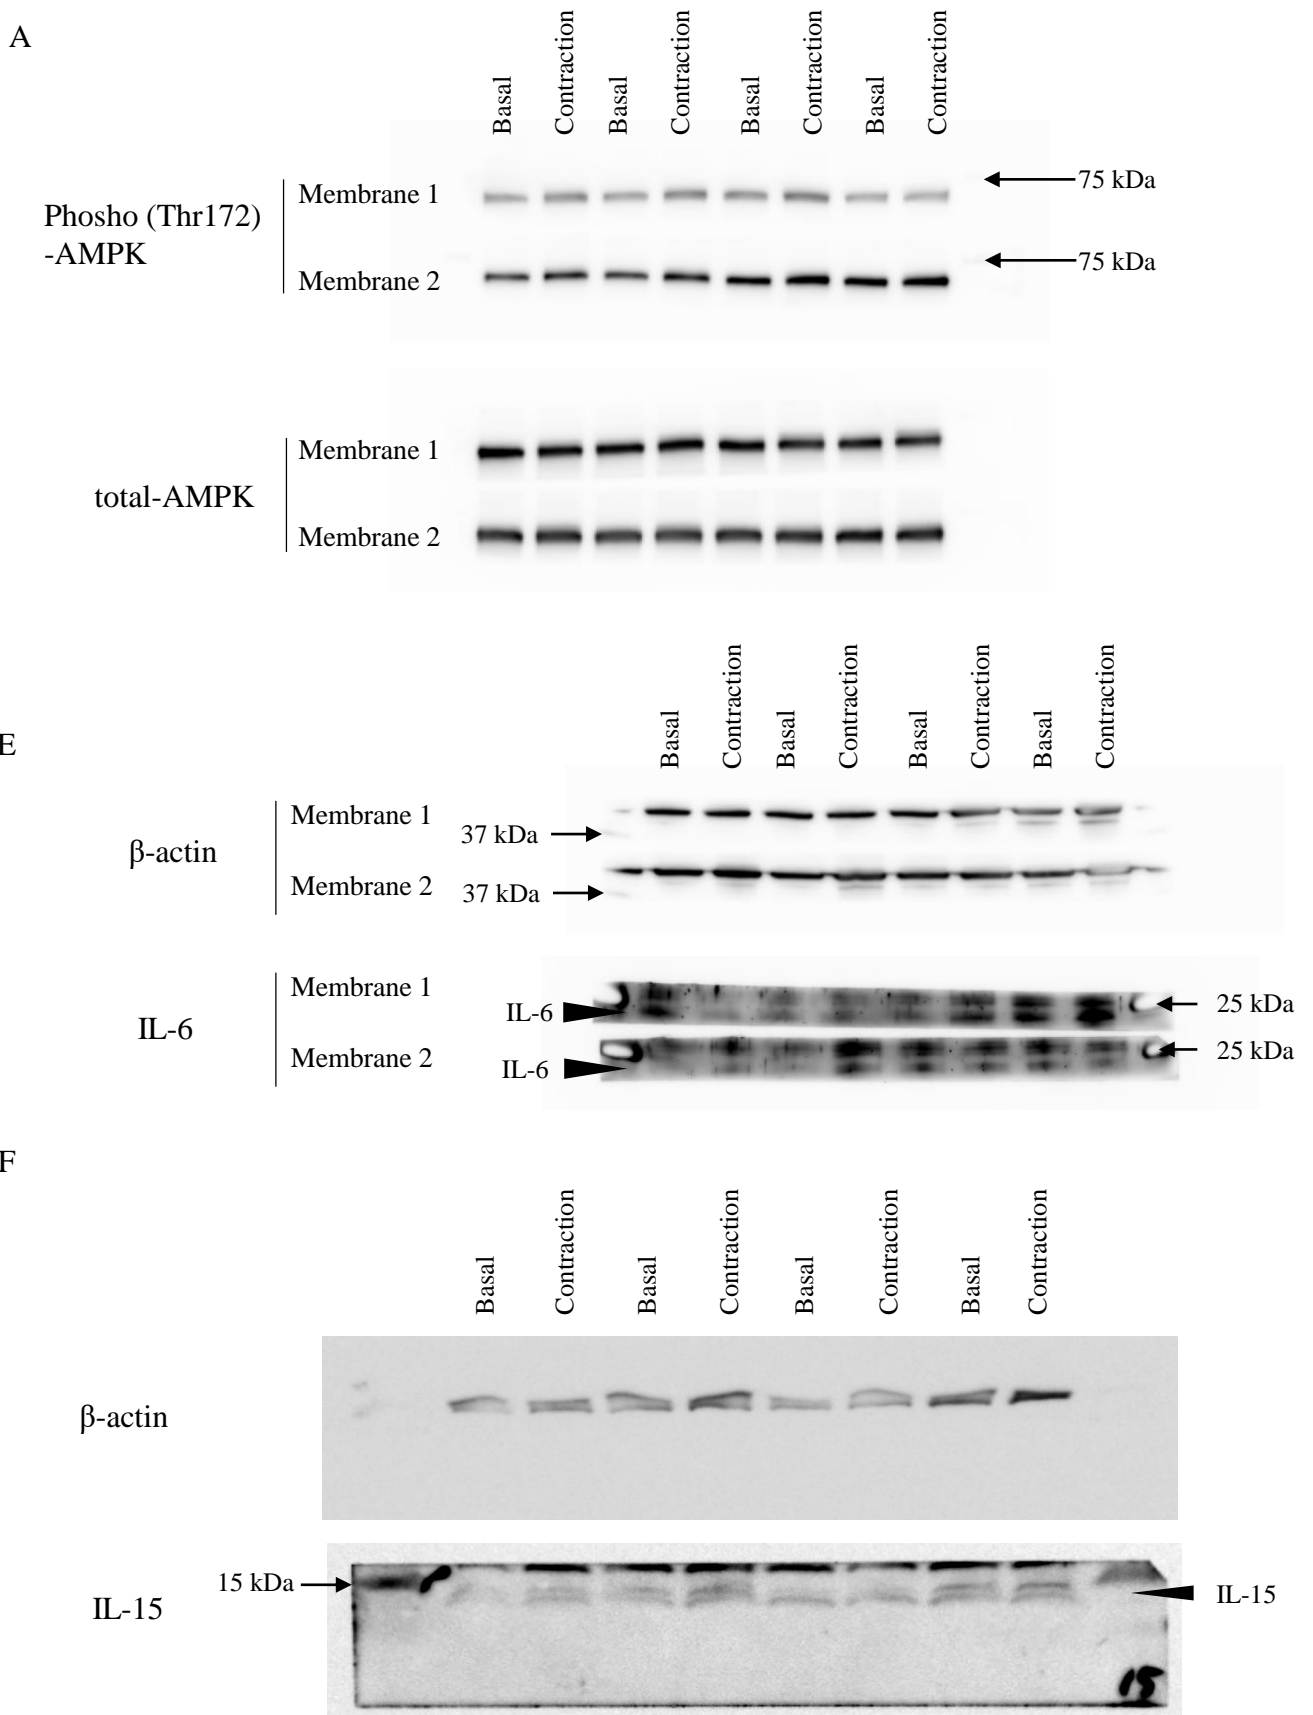

Detection of IL-6 and IL-15 in the myotube EPS-CM was validated in our previous study [17].

## Blot images of Fig 3D & 4A (1)

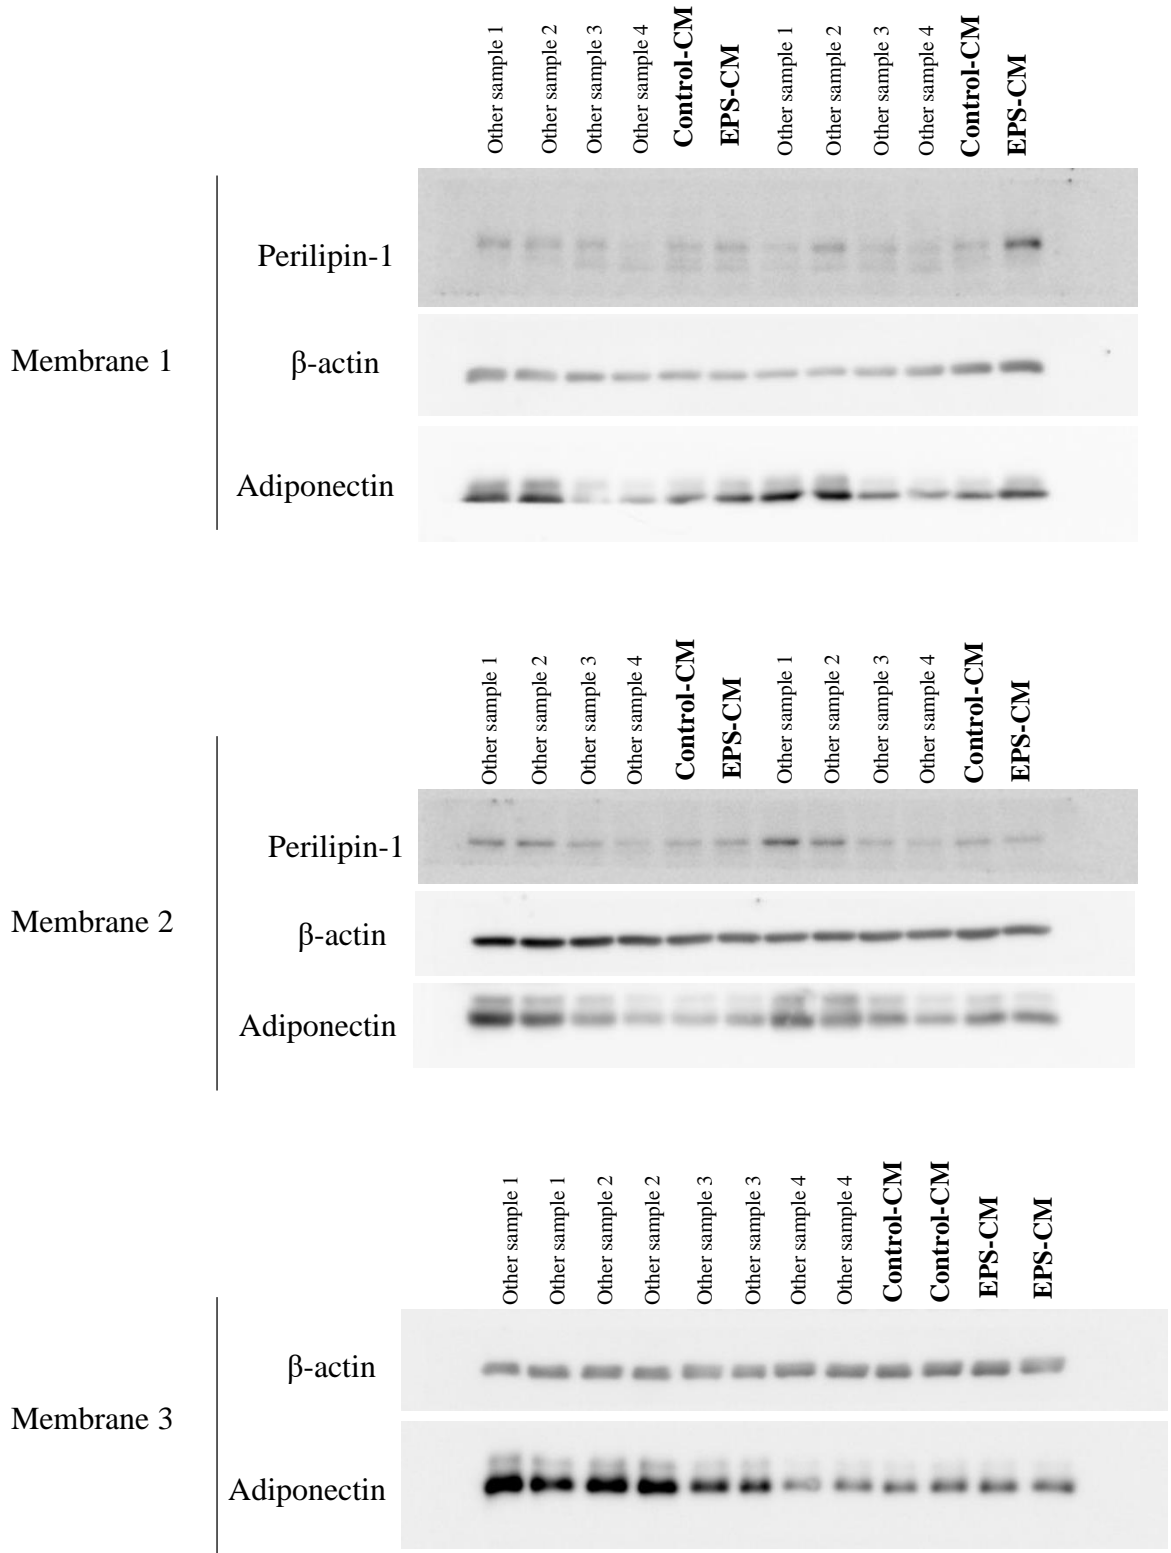

Membranes were cut into three pieces and perilipin-1 (62 kDa),  $\beta$ -actin (45 kDa), and adiponectin (27 kDa) were detected, respectively. Other samples were excluded from the results.  
 Other sample 1, 2: non-cell Control-CM, EPS-CM.  
 Other sample 3, 4: myoblast Control-CM, EPS-CM.  
 Other sample 5, 6: <3 kDa fraction of myotube Control-CM, EPS-CM.  
 Other sample 7, 8:  $\geq 3$  kDa fraction of myotube Control-CM, EPS-CM

# Blot images of Fig 3D & 4A (2)

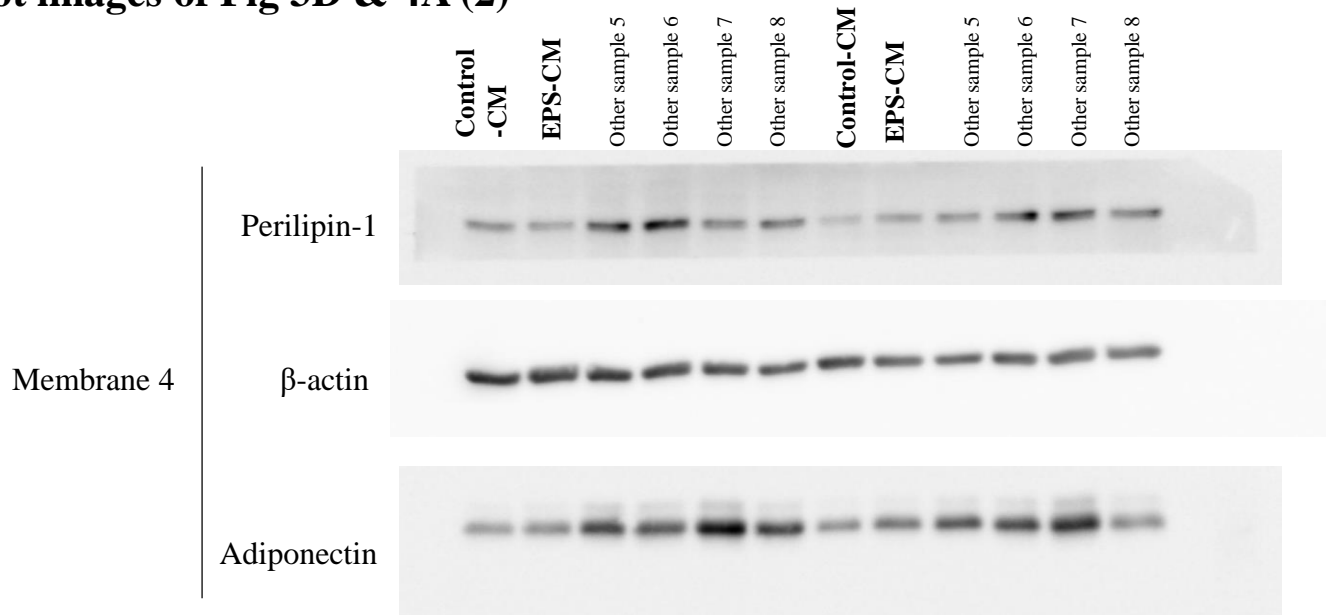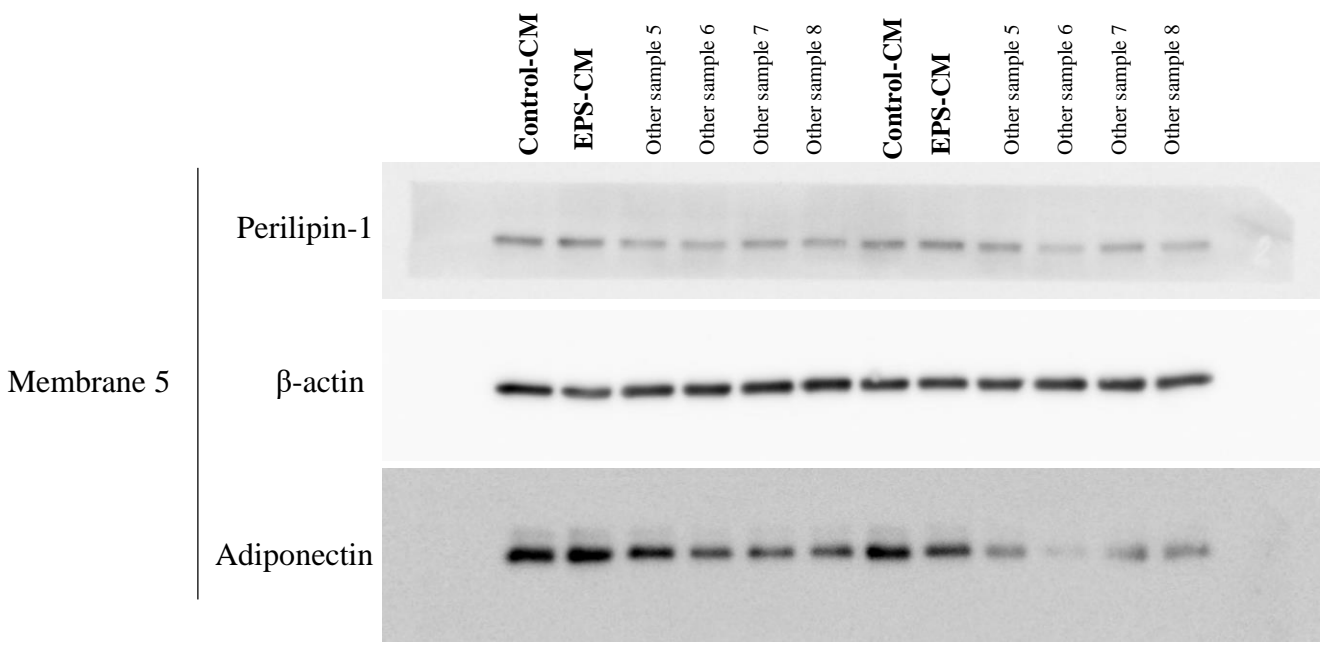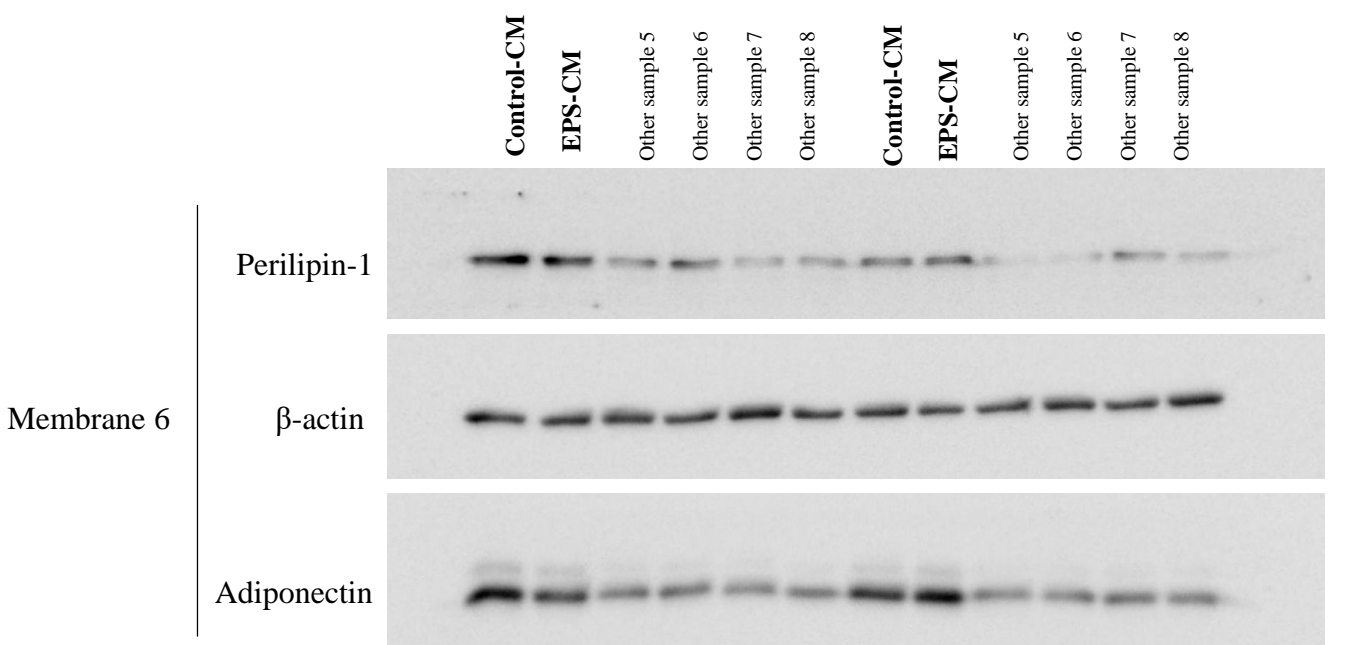

Supplement: pone.0237095.s003.pdf [file pone.0237095.s003.pdf]
